# Supplementary material
Source: Elsevier journal article supplement (https://www.sciencedirect.com/science/article/pii/S1699258X2030276X)
Supplement: mmc1 [file S1699258X2030276X:mmc1.pdf]

## **Instrumentos.**

**HAQ-DI.** El HAQ-DI está compuesto por 20 ítems que evalúan la capacidad funcional en 8 aspectos de la vida diaria durante la última semana: vestirse y asearse, levantarse, comer, caminar, higiene, alcance, agarre y actividades. Cada ítem se puntúa en una escala de tipo Likert de 4 puntos que van 0 (sin ninguna dificultad) a 3 (no puedo hacerlo)[1]. Además, se consideran 14 enunciados relacionadas con el empleo de dispositivos y/o ayuda por otras personas para realizar las actividades. Para obtener la puntuación final primero se selecciona el puntaje mayor de cada ítem como el valor para para cada uno de los aspectos de la vida diaria evaluado. Si el puntaje de alguna categoría es menor que 2, se aumenta a 2 si el paciente usa algún dispositivo o requiere de ayuda de otra persona, de modo que la discapacidad subyacente se represente con mayor precisión. El índice de incapacidad se obtiene al calcular la sumatoria del puntaje de todas las categorías contestadas en el rango de 0-3 divididas por el número de áreas[2].

**Rheumatoid Arthritis Quality of Life Scale (RAQoL).** Se empleó la versión validada para el español de México[3], la cual contiene 30 preguntas con respuesta dicotómica (Sí/No) y la calificación resulta de la suma de las respuestas positivas (rango de 0–30), a mayor puntuación peor es la calidad de vida.

**MOS Pain Severity Scale (MOS-PSS).** La escala de intensidad del dolor MOS consiste en 5 preguntas que exploran la intensidad del dolor, su frecuencia y duración durante la última semana. Los 2 primeros evalúan la intensidad del dolor en promedio y el peor dolor mediante una escala visual numérica, los últimos 3 ítems evalúan la frecuencia y su duración en una escala tipo Likert de 6 categorías de respuesta. Para la transformación de los

5 ítems en una escala de 0 a 100, se empleó la siguiente fórmula:  $(\text{puntuación obtenida} - 3)/35 \times 100$ . Una mayor puntuación indica más dolor.

**CDAI.** El CDAI es un índice compuesto para evaluar la actividad de la enfermedad en la AR. Está compuesto por 4 variables (número de articulaciones inflamadas, número de articulaciones dolorosas, evaluación global del paciente y evaluación global del médico). Su puntaje se obtiene al sumar las 4 variables, a mayor puntaje, mayor actividad de la enfermedad[4].

Nombre: \_\_\_\_\_ Fecha: \_\_\_\_\_

Versión en español del cuestionario *Health Assessment Questionnaire-II (HAQ-II)*

Estamos interesados en aprender cómo su enfermedad afecta a su capacidad para funcionar en la vida diaria. Coloque una X sobre el número de la opción que mejor describa sus capacidades habituales **durante la semana pasada**

| ¿Puede usted...                                                                                             | Sin dificultad                        | Con dificultad                        | Con mucha dificultad                  | No puedo hacerlo                      |
|-------------------------------------------------------------------------------------------------------------|---------------------------------------|---------------------------------------|---------------------------------------|---------------------------------------|
| 1. Levantarse de una silla sin ayudarse con los brazos?                                                     | <input type="checkbox"/> <sup>0</sup> | <input type="checkbox"/> <sup>1</sup> | <input type="checkbox"/> <sup>2</sup> | <input type="checkbox"/> <sup>3</sup> |
| 2. Caminar fuera de su casa, sobre un terreno plano?                                                        | <input type="checkbox"/> <sup>0</sup> | <input type="checkbox"/> <sup>1</sup> | <input type="checkbox"/> <sup>2</sup> | <input type="checkbox"/> <sup>3</sup> |
| 3. Sentarse y levantarse del retrete (inodoro, taza del baño)?                                              | <input type="checkbox"/> <sup>0</sup> | <input type="checkbox"/> <sup>1</sup> | <input type="checkbox"/> <sup>2</sup> | <input type="checkbox"/> <sup>3</sup> |
| 4. Alcanzar y bajar un objeto de 2 Kilos, como 1 bolsa de azúcar, desde una altura por encima de su cabeza? | <input type="checkbox"/> <sup>0</sup> | <input type="checkbox"/> <sup>1</sup> | <input type="checkbox"/> <sup>2</sup> | <input type="checkbox"/> <sup>3</sup> |
| 5. Abrir las puertas de un auto (coche)?                                                                    | <input type="checkbox"/> <sup>0</sup> | <input type="checkbox"/> <sup>1</sup> | <input type="checkbox"/> <sup>2</sup> | <input type="checkbox"/> <sup>3</sup> |
| 6. Limpiar un patio?                                                                                        | <input type="checkbox"/> <sup>0</sup> | <input type="checkbox"/> <sup>1</sup> | <input type="checkbox"/> <sup>2</sup> | <input type="checkbox"/> <sup>3</sup> |
| 7. Esperar de pie en una fila durante 15 minutos?                                                           | <input type="checkbox"/> <sup>0</sup> | <input type="checkbox"/> <sup>1</sup> | <input type="checkbox"/> <sup>2</sup> | <input type="checkbox"/> <sup>3</sup> |
| 8. Mover objetos pesados?                                                                                   | <input type="checkbox"/> <sup>0</sup> | <input type="checkbox"/> <sup>1</sup> | <input type="checkbox"/> <sup>2</sup> | <input type="checkbox"/> <sup>3</sup> |
| 9. Sostener objetos pesados?                                                                                | <input type="checkbox"/> <sup>0</sup> | <input type="checkbox"/> <sup>1</sup> | <input type="checkbox"/> <sup>2</sup> | <input type="checkbox"/> <sup>3</sup> |
| 10. Subir rápidamente las escaleras?                                                                        | <input type="checkbox"/> <sup>0</sup> | <input type="checkbox"/> <sup>1</sup> | <input type="checkbox"/> <sup>2</sup> | <input type="checkbox"/> <sup>3</sup> |

## Referencias

1. Gonzalez VM, Stewart A, Ritter PL, Lorig K. Translation and validation of arthritis outcome measures into Spanish. *Arthritis Rheum*. 1995;38(10):1429-46.
2. Bruce B, Fries JF. The Stanford Health Assessment Questionnaire: dimensions and practical applications. *Health Qual Life Outcomes*. 2003;1:20.
3. Pacheco-Tena C, Reyes-Cordero G, McKenna SP, Rios-Barrera VA. Adaptacion y validacion del Rheumatoid Arthritis Quality of Life Scale (RAQoL) al español de Mexico. *Reumatol Clin*. 2011;7(2):98-103.
4. Horta-Baas G, Perez Bolde-Hernandez A, Hernandez-Cabrera MF, Vergara-Sanchez I, Romero-Figueroa MDS. Evaluacion de la actividad de la artritis reumatoide en la atencion clinica habitual. Concordancia entre la autoclinimetria y la evaluacion clinica con los indices de actividad: DAS28, CDAI y SDAI. *Med Clin (Barc)*. 2017;149(7):293-9.
